# Supplementary material for: Is the quality of hospital EHR data sufficient to evidence its ICHOM outcomes performance in heart failure? A pilot evaluation
Source: bioRxiv or medRxiv preprint supplement (doi:10.1101/2021.02.04.21250990), 2021-02-05
Supplement: Supplementary file [file media-3.pdf]

**Supplementary Table 3.** Results of descriptive analyses.

| <b>Item</b>                    | <b>Descriptive statistics</b>      |
|--------------------------------|------------------------------------|
| <b>Numerical variables</b>     | Median (IQR)                       |
| Age at admission (years)       | 78 (68-84)                         |
| Age at death (years)           | 82 (74-87)                         |
| Height (cm)*                   | 163 (155-170)                      |
| Weight (kg) *                  | 74 (65-85)                         |
| Hospital admissions (number)   | 0 (0-0)                            |
| Hospital appointments (number) | 0 (0-0)                            |
| <b>Date variables</b>          | Median (range)                     |
| Date of arrival                | 03/03/2013 (23/03/1990-24/07/2017) |
| Date of discharge              | 20/03/2013 (03/10/2006-27/09/2017) |
| <b>Categorical variables</b>   | Proportions                        |
| Sex                            | Male (53%); Female (47%)           |
| Atrial fibrillation            | Yes (15%); No (85%); Unknown (0%)  |
| Prior MI                       | Yes (28%); No (72%); Unknown (0%)  |
| Hypertension                   | Yes (28%); No (72%); Unknown (0%)  |
| Diabetes mellitus              | Yes (14%); No (86%); Unknown (0%)  |
| Echocardiogram performed       | Yes (3%); No (97%); Unknown (0%)   |
| Alcohol use                    | Yes (3%); No (97%); Unknown (0%)   |
| Smoking status                 | Yes (10%); No (90%); Unknown (0%)  |
| Beta Blocker                   | Yes (25%); No (75%); Unknown (0%)  |
| Calcium Channel Blocker        | Yes (18%); No (82%); Unknown (0%)  |
| Digoxin                        | Yes (10%); No (90%); Unknown (0%)  |
| Diuretics                      | Yes (43%); No (57%); Unknown (0%)  |

\* After recoding 0's to missing values
